# Supplementary material
Source: publisher site journal article supplement (https://www.spandidos-publications.com/1485/downloadSupplementary)
Supplement: Supplementary file 1 [file downloadSupplementary]

## Sheet: Sheet1
Table SII. KEGG pathway enrichment analyses in Wilms Tumor.
ID	Description	GeneRatio	BgRatio	P-value	P-adjust	q-value	geneID	Count
hsa03030	DNA replication	25/1844	36/7469	1.823×10-8	5.743×10-6	4.510×10-6	4175/4176/4171/4173/5558/1763/5984/5983/5982/4172/57804/10535/54107/5426/5111/5557/5427/5985/5422/2237/3978/10714/5424/23649/4174	25
hsa05166	Human T-cell leukemia virus 1 infection	101/1844	255/7469	6.222×10-8	9.799×10-6	7.695×10-6	8324/3601/3383/598/958/701/3561/991/4602/9133/5155/4605/3932/3133/7976/7514/9232/3134/7040/1869/291/706/7538/4792/5902/6929/4085/4791/6776/1870/7048/2535/1871/6237/467/2114/115650/1959/2353/5291/1111/11200/57804/3108/1499/54107/5426/5901/3106/1958/5111/3123/8850/3105/5427/3111/4776/3107/1019/11211/1387/4790/894/3113/4055/10714/5424/7412/3115/6688/108/64682/5154/8295/4772/94241/3554/4773/8323/115/…	101
hsa04110	Cell cycle	56/1844	124/7469	4.427×10-7	4.648×10-5	3.650×10-5	4616/3066/6502/995/990/701/4175/699/7272/991/9133/4176/4171/4998/983/890/4173/9232/9126/7040/8318/1869/891/5885/4085/1017/9088/1870/1647/5347/5591/8317/23594/9134/1871/993/9700/4172/1111/10971/11200/10926/5933/5111/8243/1019/1387/10912/894/1875/10459/898/4174/64682/8900/1029	56
hsa04142	Lysosome	54/1844	123/7469	2.096×10-6	1.651×10-4	1.296×10-5	3373/1512/2517/130340/10312/1203/285362/10053/3073/1509/410/427/5476/1201/2548/4669/1522/1212/23659/527/6609/84572/537/55353/9516/1519/4758/26985/1514/4126/51172/1777/2799/2588/5660/6556/2720/3916/6272/26503/9114/1497/1075/8906/2629/533/3425/1515/6448/10577/8905/175/1520/8722	54
hsa04514	Cell adhesion molecules (CAMs)	59/1844	144/7469	1.042×10-5	6.567×10-4	5.157×10-4	3383/24146/4684/6385/958/3897/1000/3133/90952/3384/3134/965/1366/3696/999/80381/26047/50848/6382/3108/3106/3123/3685/9076/83700/3105/1364/3111/3107/23705/9379/947/1272/4756/100506658/5175/6693/3113/7412/3115/25945/8516/9378/1003/58494/4897/10666/1013/3122/6402/9369/3683/3117/3118/1365/933/3127/6404/6900	59
hsa04218	Cellular senescence	63/1844	160/7469	2.375×10-5	1.247×10-3	9.793×10-4	4616/5928/59341/5603/9133/4605/5501/3133/983/8878/890/3134/7040/1869/291/891/5595/1017/23411/1870/1647/7048/9134/1871/6237/286826/993/5291/2305/1111/823/11200/5606/3710/5933/5608/3106/5054/3105/678/4776/3107/10758/1019/10912/4790/894/1875/9261/824/898/5600/8900/4772/91750/4773/801/808/1029/6300/2626/10000/4775	63
hsa04115	p53 signaling pathway	33/1844	72/7469	7.079×10-5	3.186×10-3	2.502×10-3	4616/3732/598/84883/9133/983/891/6241/51512/1017/1647/9134/1111/11200/841/50484/5054/9540/64326/7057/1019/10912/894/64065/900/898/836/8795/54205/1029/92344/317/7161	33
hsa04015	Rap1 signaling pathway	75/1844	206/7469	9.656×10-5	3.630×10-3	2.851×10-3	5909/10411/7010/50855/5603/4254/5155/2261/8631/2246/2253/84612/5595/7408/1435/6237/2254/6494/5291/999/5606/25780/84552/1499/5608/9002/7074/1942/11069/9564/7057/2260/2324/5335/2321/3791/1944/5880/5600/56034/108/5154/1399/5587/4804/5332/9863/8822/2770/56288/3397/7423/4233/115/1945/111/64411/801/808/2264/7422/2904/6300/5228/196883/3683/3082/1956/2903/5028/10000/107/57568/83660/1268	75
hsa04010	MAPK signaling pathway	101/1844	295/7469	1.113×10-4	3.630×10-3	2.851×10-3	7010/10125/4616/3925/8717/3481/3164/5603/4254/408/3306/5155/2261/7040/9448/6885/2246/2253/5595/4791/1647/1435/7048/6237/1844/5924/1843/2254/2353/1326/51347/27330/1845/1852/6195/5606/25780/5608/8569/55799/1942/4217/2064/2065/9064/5871/5321/1846/8913/2260/2324/2321/8986/2872/2122/774/10912/4790/5058/4296/9261/3791/1944/1850/784/7867/5880/5600/56034/5154/8911/1399/4804/1847/836/4772/3554/8822/27092/…	101
hsa05145	Toxoplasmosis	46/1844	113/7469	1.153×10-4	3.630×10-3	2.851×10-3	4261/330/598/958/5603/3910/6774/3306/7040/6885/4792/5595/8651/5606/3108/841/5608/3123/3111/7097/3911/4790/4793/3113/6772/3588/3115/5600/3913/836/2770/3122/54205/3716/3918/240/23643/6300/3117/3118/3127/3915/10000/284217/146850/5294	46
hsa05120	Epithelial cell signaling in Helicobacter pylori infection	31/1844	68/7469	1.317×10-4	3.740×10-3	2.938×10-3	525/245973/10312/5603/1839/523/4792/529/4067/527/51382/8992/537/50848/5336/83700/5335/9114/4790/5058/533/5600/9296/58494/836/10392/4233/6352/6300/155066/1956	31
hsa04360	Axon guidance	65/1844	175/7469	1.425×10-4	3.740×10-3	2.937×10-3	59277/64218/6091/55740/50855/3897/29984/54961/7976/64221/56920/84612/5595/6237/658/5291/2041/6585/2534/7869/2242/5336/219699/84552/6092/1942/90249/4776/5335/10507/9353/2049/7852/57556/655/5058/8633/1944/10512/91653/5880/56896/1949/2770/56288/80031/1630/4773/4233/1945/151449/10371/10500/5364/1947/4917/2051/10501/81029/816/5063/7223/4775/25791/2042	65
hsa03410	Base excision repair	18/1844	33/7469	2.208×10-4	5.350×10-3	4.201×10-3	55247/10039/3146/79661/142/328/57804/54107/5426/6996/5111/5427/2237/3978/10714/3980/5424/5423	18
hsa01040	Biosynthesis of unsaturated fatty acids	14/1844	23/7469	2.399×10-4	5.399×10-3	4.240×10-3	30/54898/6319/9415/55825/122970/60481/10965/79966/3992/641371/11332/9200/401494	14
hsa04659	Th17 cell differentiation	43/1844	107/7469	2.670×10-4	5.406×10-3	4.245×10-3	2625/5603/3561/6774/3932/7040/4792/5588/5595/6776/7048/196/2353/9466/6778/3108/3326/3123/3111/3091/4794/5335/4790/4793/3572/3113/6772/3115/3566/5600/4772/3554/6258/4773/3122/53342/3716/6300/6095/3117/3118/3127/4775	43
hsa04714	Thermogenesis	80/1844	229/7469	2.746×10-4	5.406×10-3	4.245×10-3	2180/51703/5564/1346/51422/11343/5468/5603/6389/10891/57104/1374/9658/4538/6599/4539/4509/6605/4508/4519/5563/4540/2182/23028/4512/4723/4514/4881/27330/123096/4513/4541/4537/4535/6195/374291/513/5606/4536/86/4217/788/6390/2260/6602/28958/6392/25915/6598/116228/516/8193/8289/10476/4717/5600/108/1351/4728/4716/84987/10063/6196/115/6595/1537/111/4694/1327/6300/4707/196883/1329/1349/51079/8110/107/12…	80
hsa04658	Th1 and Th2 cell differentiation	38/1844	92/7469	3.112×10-4	5.766×10-3	4.528×10-3	2625/5603/3561/3932/4792/5588/5595/6776/3516/10683/2353/6778/3108/3123/3714/3111/4794/9794/5335/4853/4790/4793/55534/3113/6772/3115/3566/5600/4772/4773/3122/3716/6300/3117/3118/3127/54567/4775	38
hsa04670	Leukocyte transendothelial migration	44/1844	112/7469	4.114×10-4	7.200×10-3	5.654×10-3	10411/2185/3383/24146/5603/90952/1366/7408/7430/6494/5291/5829/50848/5336/10451/1499/11069/9076/83700/1364/9564/5335/7070/7852/100506658/5175/29119/7412/103910/5880/5600/1003/81/58494/10398/10627/2770/1535/4478/1496/6300/3683/1365/4689	44
KEGG, Kyoto Encyclopedia of Genes and Genomes; BgRatio, Background Ratio.
